# Supplementary material for: Construction of therapeutically relevant human prostate epithelial fate map by utilising miRNA and mRNA microarray expression data
Source: PubMed Central journal article supplement — Br J Cancer. 2015 Jul 23;113(4):611–5. doi: 10.1038/bjc.2015.262 (PMC4647689; doi:10.1038/bjc.2015.262), 2015-07-23
Supplement: bjc2015262x1.pdf [file bjc2015262x1.pdf]

## SUPPLEMENTARY FIGURES

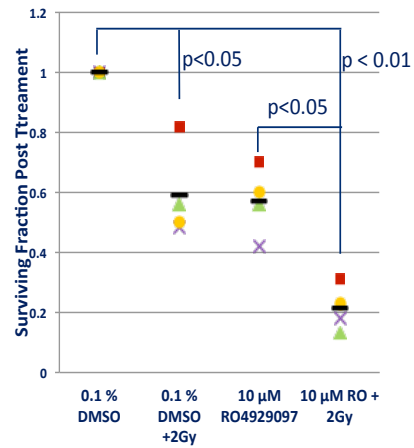

FIGURE S1: Relative colony forming efficiency of SC after treatment with indicated agent (n=5 PCa)

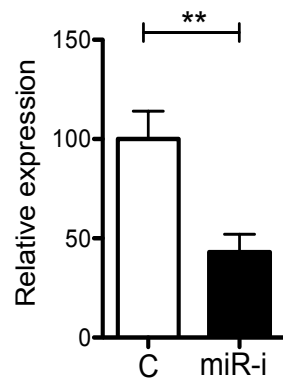

Figure S2: qRT-PCR analysis to measure miR-542-5p expression in CB cells 72 hours after transfection with miR-542-5p inhibitor (miR-i) ( $n=3$  BPH and PCa each).  $**p<0.01$ , student's t-test.

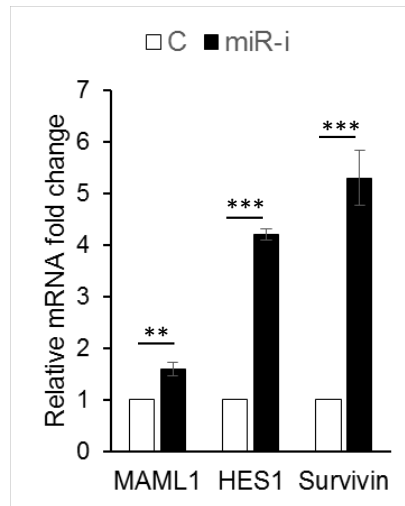

FIGURE S3: qRT-PCR expression of Notch-associated genes in CB cells transfected with miR-542-5p inhibitor or control for 72 hours. ( $n=3$  BPH and PCa each), \*  $p<0.05$ , \*\* $p<0.01$ , \*\*\* $p<0.001$  student's t-test)
